# Supplementary material for: Robust and Rigorous Identification of Tissue-Specific Genes by Statistically Extending Tau Score
Source: Research Square preprint supplement (doi:10.21203/rs.3.rs-1956522/v1), 2022-08-29

# Determination of Tissue Specific Genes - Algorithm

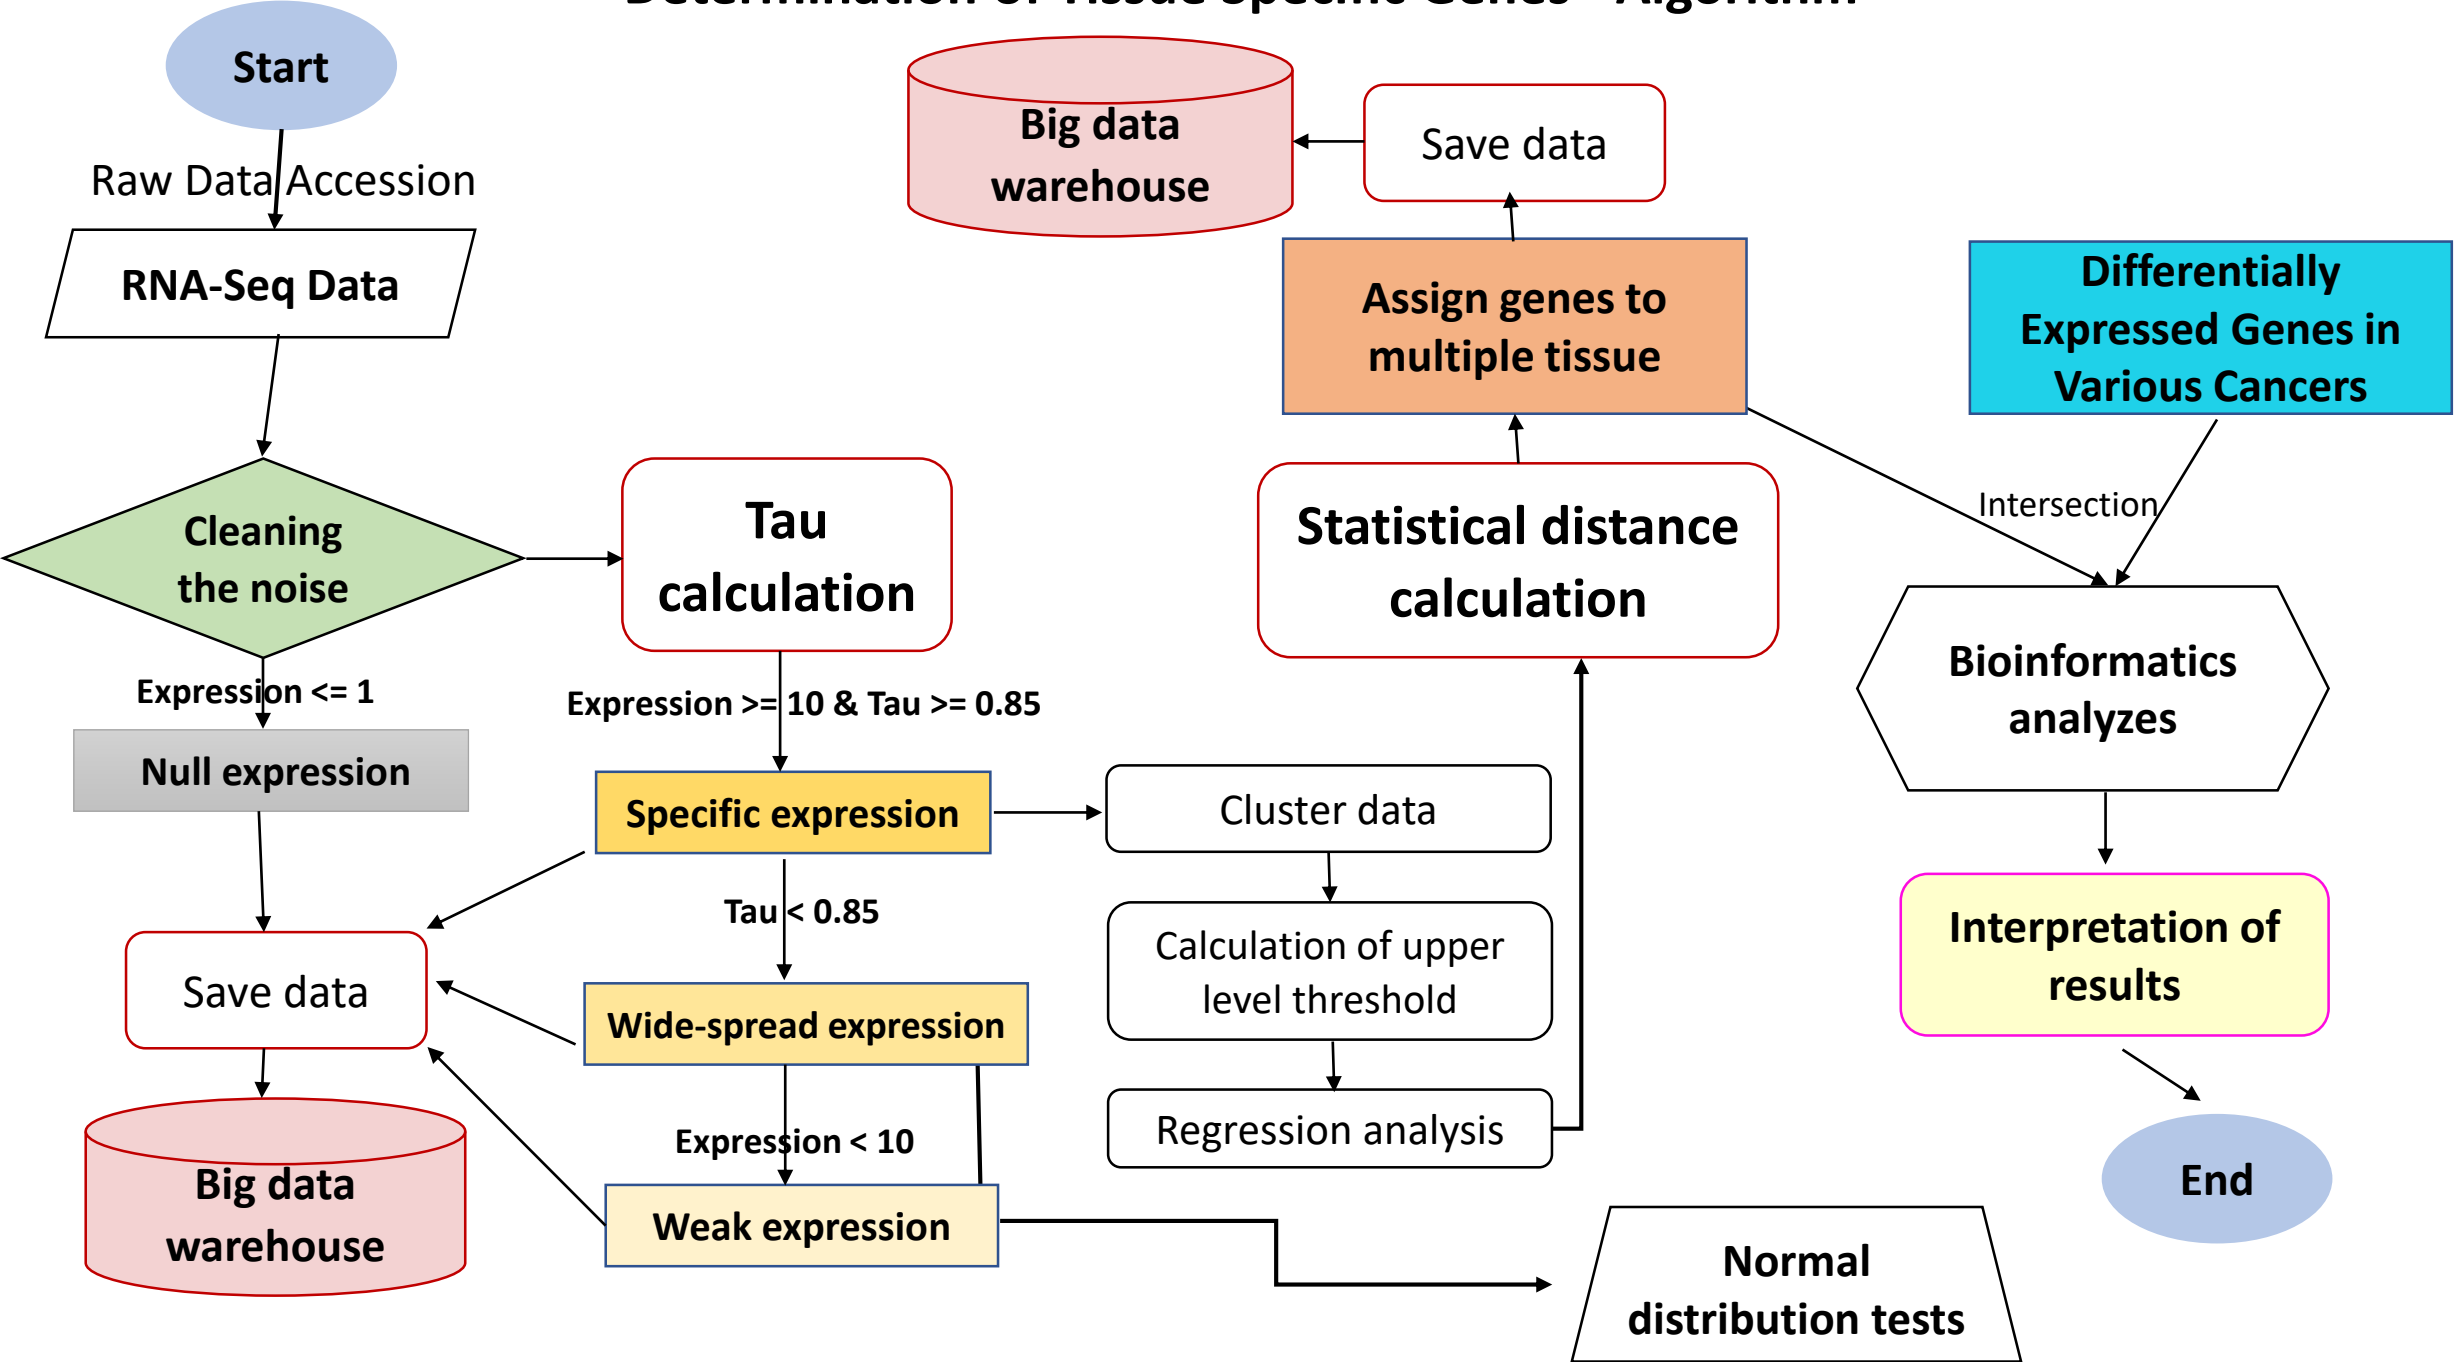

Supplement: Supplementary file [file 5d635c654d1bf93139f87112.pdf]
