# Supplementary material for: Robust and Rigorous Identification of Tissue-Specific Genes by Statistically Extending Tau Score
Source: Research Square preprint supplement (doi:10.21203/rs.3.rs-1956522/v1), 2022-08-29

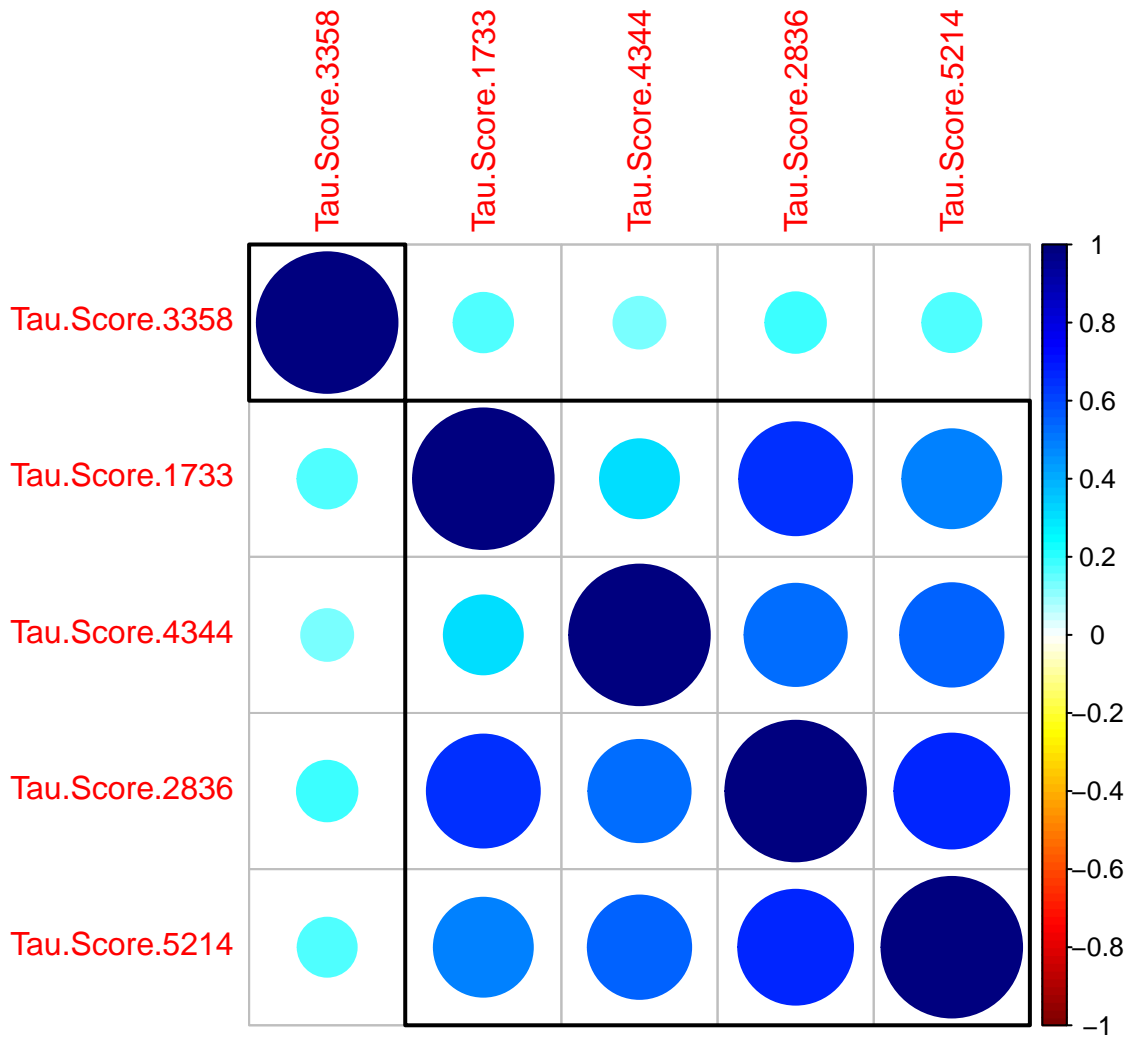

Supplement: Supplementary file [file c175b4efb5daddfb71debb71.pdf]
